# Supplementary material for: Effects of GO oxidation degree on GO/BuMgCl-supported Ti-based Ziegler–Natta catalyst performance and nanocomposite properties
Source: Royal Society of Chemistry journal article supplement (doi:10.1039/c6ra00141f), 2016-01-01

## Effects of GO Oxidation Degree on GO/BuMgCl-supported Ti-based Ziegler-Natta Catalysts Performance and Nanocomposite Properties

He-Xin Zhang,<sup>a,b</sup> Min-Gi Bae,<sup>a</sup> Jae-Hyeong Park,<sup>a</sup> Eun-Bin Ko,<sup>a</sup> Dong-Ho Lee,<sup>a</sup> Xue-Quan Zhang<sup>b</sup> and Keun-Byoung Yoon<sup>a\*</sup>

<sup>a</sup> Department of Polymer Science and Engineering, Kyungpook National University, Daegu, Korea

<sup>b</sup> Key Lab. of Synthetic Rubber, Changchun Institute of Applied Chemistry, Chinese Academic of Science, Changchun, China

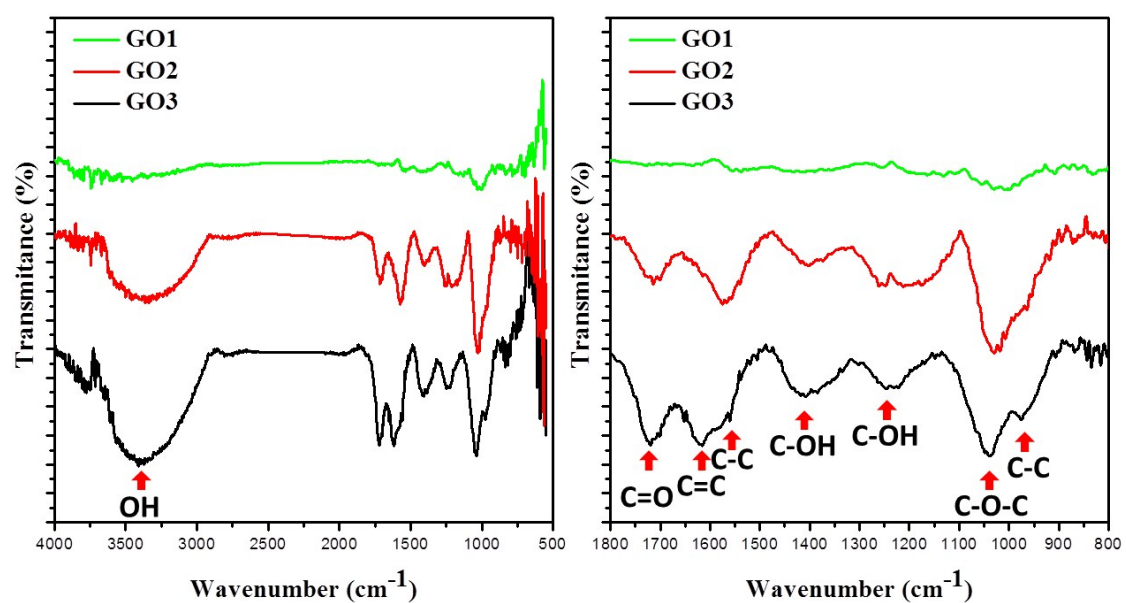

Figure S1. FT-IR spectra of GO1, GO2 and GO3

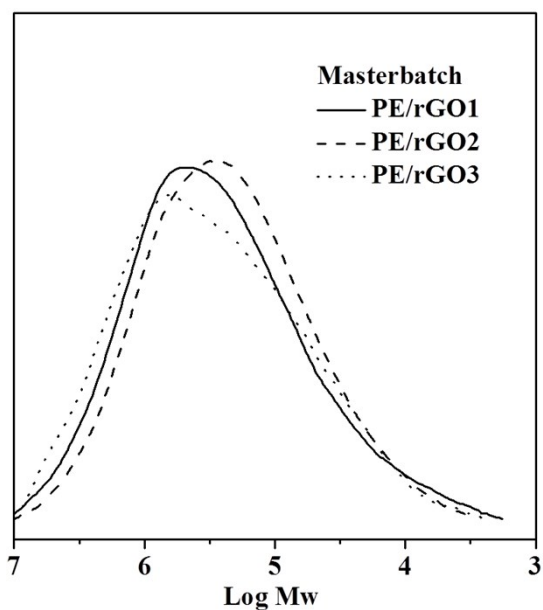

Figure S2. GPC curves of PE/rGO1, PE/rGO2, and PE/rGO3 (Polymerization temp.: 40°C, [Al]/[Ti] = 100)

Table S1. Molecular Weight of PE/rGO1, PE/rGO2, and PE/rGO3 (Polymerization temp.: 40°C, [Al]/[Ti] = 100)

| Samples | Mw<br>( $\times 10^4$ g/mol) | MWD |
|---------|------------------------------|-----|
| PE/rGO1 | 67.1                         | 9.3 |
| PE/rGO2 | 53.1                         | 6.7 |
| PE/rGO3 | 77.8                         | 9.4 |

Reaction between GO and RMgCl

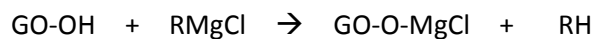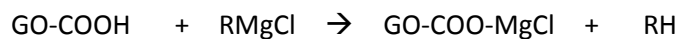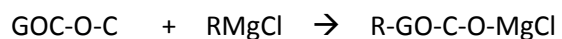

Supplement: c6ra00141f1.pdf [file c6ra00141f1.pdf]
